# Supplementary material for: Salting-Out of DNA Origami Nanostructures by Ammonium Sulfate
Source: MDPI journal article supplement (doi:10.3390/ijms23052817), 2022-03-04
Supplement: s1 [file s1]

# Supplementary Materials

## Salting-out of DNA Origami Nanostructures by Ammonium Sulfate

*Marcel Hanke*<sup>1</sup>, *Niklas Hansen*<sup>1,†</sup>, *Ruiping Chen*<sup>1</sup>, *Guido Grundmeier*<sup>1</sup>, *Karim Fahmy*<sup>2,3</sup>

*and Adrian Keller*<sup>1,\*</sup>

<sup>1</sup> Paderborn University, Technical and Macromolecular Chemistry, Warburger Str. 100, 33098 Paderborn, Germany

<sup>2</sup> Helmholtz-Zentrum Dresden-Rossendorf, Institute of Resource Ecology, Bautzner Landstrasse 400, 01328 Dresden, Germany

<sup>3</sup> Technische Universität Dresden, Center for Molecular and Cellular Bioengineering, 01062 Dresden, Germany

<sup>†</sup> Present address: Department of Biophysical Chemistry, J. Heyrovsky Institute of Physical Chemistry, Czech Academy of Sciences, Dolejškova 3, 182 23 Prague 8, Czech Republic

\* Correspondence: [adrian.keller@uni-paderborn.de](mailto:adrian.keller@uni-paderborn.de), Tel.: +49-5251-605722

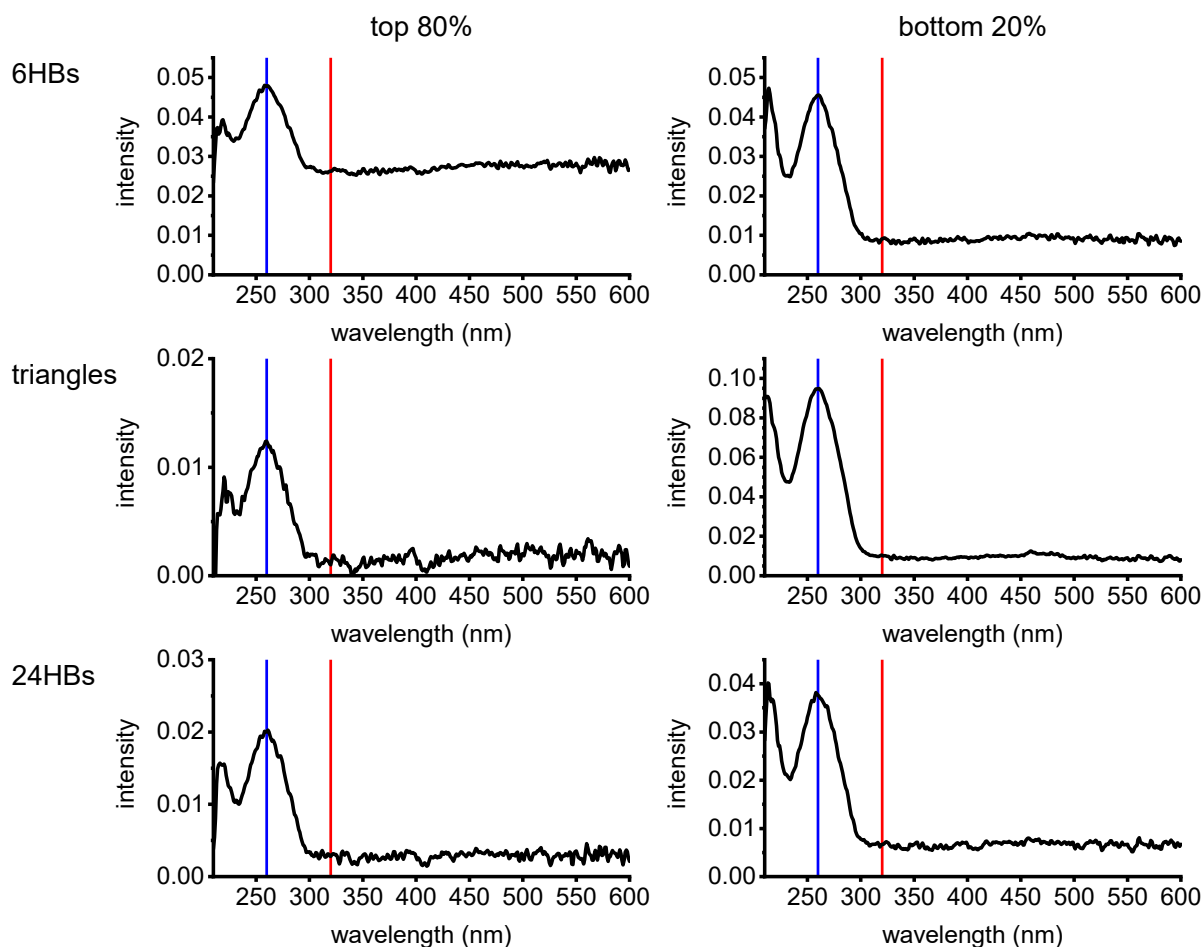

**Figure S1:** Example UV-vis spectra of DNA origami 6HBs (top), triangles (center), and 24HBs (bottom) after centrifugation in 3 M ammonium sulfate. The spectra on the left and right were recorded in the top 80% and bottom 20% fraction of the total sample volume, respectively. The vertical lines indicate the wavelengths used for DNA quantification (260 nm, blue) and background subtraction (320 nm, red), respectively.

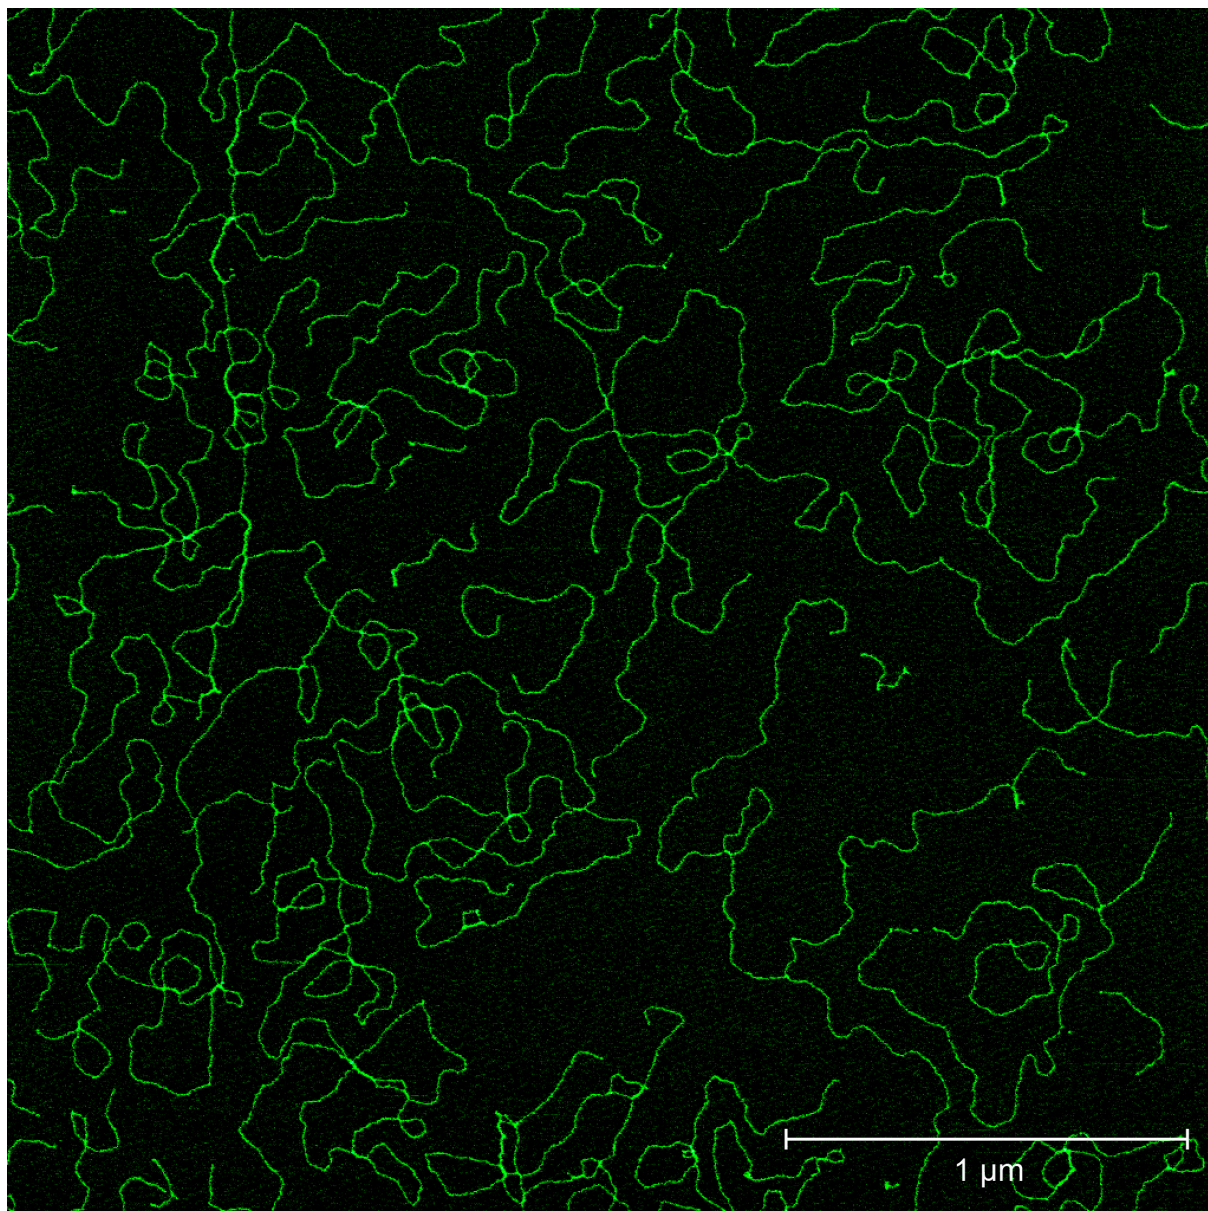

**Figure S2:** Representative AFM image of genomic dsDNA from salmon testes.
